# Supplementary material for: Metallic behaviour in SOI quantum wells with strong intervalley scattering
Source: PubMed Central journal article supplement — Sci Rep. 2013 Jun 18;3:2011. doi: 10.1038/srep02011 (PMC3684805; doi:10.1038/srep02011), 2013-06-18
Supplement: srep02011-s1.pdf [file srep02011-s1.pdf]

# Metallic behaviour in SOI quantum well with strong intervalley scattering - Supplementary information

V. T. Renard<sup>1\*</sup>, I. Duchemin<sup>2</sup>, Y. Niida<sup>3</sup>, A. Fujiwara<sup>4</sup>, Y. Hirayama<sup>3</sup>, and K. Takashina<sup>5</sup>

<sup>1</sup>*SPSMS, UMR-E 9001, CEA-INAC/UJF-Grenoble 1, INAC, Grenoble F-38054, France*

<sup>2</sup>*SP2M, UMR-E 9001, CEA-INAC/UJF-Grenoble 1, INAC, Grenoble F-38054, France*

<sup>3</sup>*Graduate School of Science, Tohoku University,*

*6-3 Aramaki-za Aoba, Aobaku, Sendai, 980-8578 Japan*

<sup>4</sup>*NTT Basic Research Laboratories, NTT Corporation, Atsugi-shi, Kanagawa 243-0198, Japan*

<sup>5</sup>*Department of Physics, University of Bath, Bath BA2 7AY, UK*

This document contains the supplemental material on the analysis of Weak Localization magneto-conductance.

## I. WEAK LOCALIZATION IN PRESENCE OF INTERVALLEY SCATTERING.

The theory of weak localization in two-valley systems in presence of intervalley scattering and for small valley splitting ( $\Delta_v < \hbar/\tau$ ) is developed in Ref. 1. The weak localization to conductivity has the following form:

$$\delta\sigma_{WL}(B, T) = \Delta\sigma^{(a)} + \Delta\sigma^{(b)} \quad (1)$$

with

$$\Delta\sigma^{(a)} = -\frac{e^2 b}{2\pi^2 \hbar} \sum_{N=0}^{\infty} \mathcal{C}_N P_N^2, \quad (2)$$

$$\Delta\sigma^{(b)} = \frac{e^2 b}{2\pi^2 \hbar} \sum_{N=0}^{\infty} (\mathcal{C}_N + \mathcal{C}_{N+1}) Q_N^2 / 2. \quad (3)$$

$$\mathcal{C}_N = \frac{2(1 - \tau/\tau_{\perp})^3 P_N}{1 - (1 - \tau/\tau_{\perp})P_N} + \frac{P_N}{1 - P_N} - \frac{(1 - 2\tau/\tau_{\perp})^3 P_N}{1 - (1 - 2\tau/\tau_{\perp})P_N}, \quad (4)$$

where  $P_N$  and  $Q_N$  are coefficients which are given by

$$(1 + z)P_N = \mathcal{P}_N = s \int_0^{\infty} dx L_N(x^2) e^{(-sx - \frac{x^2}{2})}, \quad (5)$$

$$(1 + z)Q_N = \mathcal{Q}_N = s \int_0^{\infty} dx x \frac{L_N^1(x^2)}{\sqrt{N+1}} e^{(-sx - \frac{x^2}{2})}, \quad (6)$$

and  $L_N$  and  $L_N^1$  are the Laguerre polynomials,  $\tau_{\perp}$  the intervalley scattering time,  $z$  is the ratio of the transport time  $\tau$  and the phase coherence time  $\tau_{\varphi}$  and  $s = (1 + z)\sqrt{\frac{2}{b}}$  with  $b = 2el^2B/\hbar$  ( $l$  is the mean free path).

Kawabata<sup>2</sup> showed that the  $P_N$  can be found recursively as follows:

$$\mathcal{P}_0 = s\sqrt{\frac{\pi}{2}} e^{\frac{s^2}{2}} \operatorname{erfc}\left(\frac{s}{\sqrt{2}}\right) \quad (7)$$

$$\mathcal{P}_1 = s^2 - s^2\mathcal{P}_0 \quad (8)$$

$$\mathcal{P}_N = \frac{1}{N} [(N-1 + s^2)(\mathcal{P}_{N-2} - \mathcal{P}_{N-1}) + (N-2)\mathcal{P}_{N-3}] \quad (9)$$

---

\* Correspondance to : vincent.renard@cea.fr

Once the  $\mathcal{P}_N$  are computed, the  $\mathcal{Q}_N$  terms can be evaluated with the following expression[3]:

$$\mathcal{Q}_N = \frac{s}{\sqrt{N+1}} (1 - \mathcal{P}_N) - \sqrt{\frac{N}{N+1}} \mathcal{Q}_{N-1} \quad (10)$$

Contrary to Refs. 1, 3 we used the recursive definition of  $P_N$  and  $Q_N$  for all  $N$  up to  $N = 10^5$ . The stability of the recursion on  $P_N$  is guaranted by working with large precision numbers. In particular, lower  $b$  values require increased numbers of digits. Therefore our implementation makes use the multiple precision real number class (through the C++ interface for MPFR library provided by Pavel Holoborodko. The following part presents the code used for the computation.

### A. Main file

```

1  #include <math.h>
2  #include <stdlib.h>
3  #include <iostream>
4  #include "mpreal.h"
5  #include "Compute_Pn.h"
6  #include "Compute_Qn.h"
7  #include "Compute_Cn.h"
8  #include "Compute_Sigma.h"
9
10 using namespace mpfr;
11
12 int usage(int argc, char **argv)
13 {
14     // print explanations
15     std::cout << "usage: " << argv[0] << " nmax prec b tau/tau_v tau/tau_phi" << std::endl;
16     std::cout << std::endl;
17     std::cout << " nmax          : maximum order of Pn/Qn developpment" << std::endl;
18     std::cout << " prec           : precision (in bits) to be used for Pn's recursion calculation" << std::endl;
19     std::cout << " b             : reduced magnetic field" << std::endl;
20     std::cout << " tau/tau_v     : transport to intervalley scattering time ratio" << std::endl;
21     std::cout << " tau/tau_phi   : transport to phase coherence time ratio" << std::endl;
22     std::cout << std::endl;
23     std::cout << "returns: " << std::endl;
24     std::cout << std::endl;
25     std::cout << " sigma_a,sigma_b : weak localization detailed contributions (see A. Y. Kuntsevich et al.)" << std::endl;
26     std::cout << " d_sigma        : sigma_a + sigma_b, in e/h unit" << std::endl;
27     std::cout << std::endl;
28     // return
29     return 1;
30 }
31
32 int main(int argc, char **argv)
33 {
34     // print info and refs
35     std::cout << std::endl;
36     std::cout << "===== " << std::endl;
37     std::cout << "= compute weak localization correction with intervalley scattering" << std::endl;
38     std::cout << "= see A. Y. Kuntsevich et al., Phys. Rev. B. 75, 195330 (2007) for further references" << std::endl;
39     std::cout << "= " << std::endl;
40     std::cout << "= Authors: I.Duchemin, V.T.Renard" << std::endl;
41     std::cout << "= 04/11/2012" << std::endl;
42     std::cout << "===== " << std::endl;
43
44     // check arguments
45     if ( argc!=6 ) return usage(argc,argv);
46
47     // get inputs
48     int nmax=atoi(argv[4]);
49     int prec=atoi(argv[5]);
50
51     // inform on parameters
52     std::cout << "using nmax =" << nmax << std::endl;
53     std::cout << "using prec =" << prec << std::endl;
54
55     // set output format
56     std::cout.precision(5);
57     std::cout.setf(std::ios::scientific);
58
59     // set extended precision
60     mpreal::set_default_prec(prec);
61
62     // get remaining inputs

```

```

63 double b=atof(argv[1]);
64 double t_over_tv=atof(argv[2]);
65 double t_over_tphi=atof(argv[3]);
66
67 // inform on parameters
68 std::cout << "using b      =" << b << std::endl;
69 std::cout << "using tau/tau_v =" << t_over_tv << std::endl;
70 std::cout << "using tau/tau_phi =" << t_over_tphi << std::endl;
71
72 // compute s in multiple precision
73 mpreal s=sqrtl(2.0/b)*(1.0+t_over_tphi);
74
75 // compute Pn in extended precision
76 std::vector<mpreal> Pn_ext=compute_Pn(s,nmax);
77
78 // set Pn in double precision
79 std::vector<double> Pn(nmax);
80 for ( int i=0 ; i<nmax ; i++ )
81 {
82     Pn[i]=Pn_ext[i].toDouble();
83 }
84
85 // visual check for Pn's values
86 std::cout << std::endl;
87 std::cout << "Pn[0]=" << Pn[0] << std::endl;
88 std::cout << "Pn[1]=" << Pn[1] << std::endl;
89 std::cout << "Pn[$]=" << Pn.back() << std::endl;
90 std::cout << std::endl;
91
92 // compute Qn in double precision
93 std::vector<double> Qn=compute_Qn(s.toDouble(),Pn);
94
95 // visual check for Qn's values
96 std::cout << "Qn[0]=" << Qn[0] << std::endl;
97 std::cout << "Qn[1]=" << Qn[1] << std::endl;
98 std::cout << "Qn[$]=" << Qn.back() << std::endl;
99 std::cout << std::endl;
100
101 // compute Cn in double precision
102 std::vector<double> Cn=compute_Cn(Pn,t_over_tv,t_over_tphi);
103
104 // compute sigma_a and sigma_b in double precision
105 double sigma_a=compute_sigma_a(Pn,Qn,Cn,b,t_over_tphi);
106 double sigma_b=compute_sigma_b(Pn,Qn,Cn,b,t_over_tphi);
107
108 // display results in units of e^2/h
109 std::cout << "results (e^2/h unit):" << std::endl;
110 std::cout << "sigma_a=" << -sigma_a << std::endl;
111 std::cout << "sigma_b=" << sigma_b << std::endl;
112 std::cout << std::endl;
113 std::cout << "b= " << b << "   d_sigma= " << sigma_b-sigma_a << std::endl;
114 std::cout << std::endl;
115
116 return 1;
117 }

```

## B. Function to compute $P'_N$ s

```

1  /*! \file Compute_Pn.h
2  \brief Template function for computing Pn's values with desired precision
3  */
4
5  #ifndef COMPUTEPN_H
6  #define COMPUTEPN_H
7
8  #include <cmath>
9  #include <vector>
10 #include <iostream>
11
12 /// \brief recursive function for Pn(s) computation up to order n. The 1/(1+z) normalization is not applied here.
13 ///
14 /// define Pn(s)= s * int exp(-s*x-x^2/2) * Ln(x^2) * dx
15 ///
16 /// \param s real number, the argument of Pn(s)
17 /// \param nmax the maximum order of the development
18 template <class Precision>
19 std::vector<Precision> compute_Pn(Precision s, int nmax)
20 {
21     //
22     // check input

```

```

23 //
24 if (nmax<0)
25 {
26     std::cout << "Error: nmax argument should be > 0. - nmax=" << nmax << " detected in compute_Pn -" << std::endl;
27 }
28 //
29 // allocate memory
30 //
31 std::vector<Precision> Pn(nmax);
32 //
33 // avoid useless arithmetic...
34 //
35 Precision s2=s*s;
36 //
37 // try to get precise constants
38 //
39 Precision ONE=1.0;
40 Precision TWO=2.0;
41 Precision PI =4.0*atan(ONE);
42 Precision sqrt2=sqrt(TWO);
43 Precision sqrtPIover2=sqrt(PI/TWO);
44 //
45 // get P0 with high precision
46 //
47 Pn[0]=s*sqrtPIover2*exp(s2/2.0)*erfc(s/sqrt2);
48 //
49 // get P1 from P0
50 //
51 Pn[1]=s2*(1.0-Pn[0]);
52 //
53 // get P2
54 //
55 Pn[2]=(1.0+s2)/(2.0)*(Pn[0]-Pn[1]);
56 //
57 // iterate recurrence
58 //
59 for ( int i=3 ; i<nmax ; i++ )
60 {
61     //
62     // compute following value
63     //
64     Precision n=i-TWO;
65     Pn[i]=((n+1.0+s2)/(n+2.0))*(Pn[i-2]-Pn[i-1])+n/(n+2.0)*Pn[i-3];
66 }
67 //
68 // return result
69 //
70 return Pn;
71 }
72
73 #endif

```

### C. Function to compute $Q'_N$ s

```

1  /*! \file Compute_Qn.h
2  \brief Template function for computing Qn's values with desired precision from Pn's values
3  */
4
5  #ifndef COMPUTEQN_H
6  #define COMPUTEQN_H
7
8  #include <cmath>
9  #include <vector>
10
11  //! \brief recursive function for Qn(s) computation up to order n. The 1/(1+z) normalization is not applied here.
12  ///
13  /// define Qn(s)= s/sqrt(n+1) * int exp(-s*x-x^2/2) * x * L_n^1(x^2) * dx
14  ///
15  /// \param s real number, the argument of Qn(s)
16  /// \param Pn Pn(s) values up to order n
17  template <class Precision>
18  std::vector<Precision> compute_Qn(Precision s, std::vector<Precision> &Pn)
19  {
20      //
21      // get number of elements to be computed
22      //
23      int nmax=Pn.size();
24      //
25      // allocate memory
26      //

```

```

27     std::vector<Precision> Qn(nmax);
28     //
29     // get Q0
30     //
31     Qn[0]=s*(1.0-Pn[0]);
32     //
33     // iterate
34     //
35     for ( int i=1 ; i<nmax ; i++ )
36     {
37         //
38         // some arithmetic
39         //
40         Precision n=i+1;
41         Precision sqrt_n=sqrt(n);
42         Precision sqrt_nm1=sqrt(n-1.0);
43         //
44         // recurrence
45         //
46         Qn[i]=(s/sqrt_n)*(1.0-Pn[i])-sqrt_nm1/sqrt_n*Qn[i-1];
47     }
48     //
49     // return result
50     //
51     return Qn;
52 }
53
54 #endif

```

#### D. Function to compute $C'_n$ s

```

1  /*! \file Compute_Cn.h
2  \brief Template function for computing Cn's values with desired precision
3  */
4
5  #ifndef COMPUTECN_H
6  #define COMPUTECN_H
7
8  #include <cmath>
9  #include <vector>
10 #include <iostream>
11
12 /// \brief recursive function for Cn(s) computation up to order n.
13 /// \param Pn Pn(s) values up to order n, without 1/(1+z) factor
14 /// \param t_over_tv real number, the fit parameter for Cns.
15 /// \param t_over_tphi real number, the fit parameter for Cns.
16 template <class Precision>
17 std::vector<Precision> compute_Cn(std::vector<Precision> &Pn, Precision t_over_tv, Precision t_over_tphi)
18 {
19     //
20     // get number of elements to be computed
21     //
22     int nmax=Pn.size();
23     //
24     // allocate memory
25     //
26     std::vector<Precision> Cn(nmax);
27     //
28     // 1/(1+z) factor
29     //
30     Precision factor=1.0/(1.0+t_over_tphi);
31     //
32     // loop on orders
33     //
34     for ( int i=0 ; i<nmax ; i++ )
35     {
36         Precision num_1=2.0*(1.0-t_over_tv)*(1.0-t_over_tv)*(1.0-t_over_tv)*Pn[i]*factor;
37
38         Precision num_2=Pn[i]*factor;
39
40         Precision num_3=(1.0-2.0*t_over_tv)*(1.0-2.0*t_over_tv)*(1.0-2.0*t_over_tv)*Pn[i]*factor;
41
42         Precision den_1=1.0-(1.0-t_over_tv)*Pn[i]*factor;
43
44         Precision den_2=1.0-Pn[i]*factor;
45
46         Precision den_3=1.0-(1.0-2.0*t_over_tv)*Pn[i]*factor;
47
48         Cn[i]=num_1/den_1+num_2/den_2-num_3/den_3;
49     }

```

```

50 //
51 // return result
52 //
53 return Cn;
54 }
55
56 #endif

```

### E. Function to compute $\delta\sigma_{WL}$

```

1  /*! \file Compute_Sigma.h
2  \brief Template function for computing Pn's values with desired precision
3  */
4
5  #ifndef COMPUTESIGMA_H
6  #define COMPUTESIGMA_H
7
8  #include <cmath>
9  #include <vector>
10 #include <iostream>
11
12 /// \brief compute sigma_a contribution
13 ///
14 /// compute b/pi * sum_n Cn*Pn
15 ///
16 /// \param Pn Pn(s) values up to order n, without 1/(1+z) factor
17 /// \param Qn Qn(s) values up to order n, without 1/(1+z) factor
18 /// \param Cn Cn(s) values up to order n
19 /// \param b real number, the fit parameter for Cns.
20 /// \param t_over_tphi real number, the fit parameter for Cns.
21 template <class Precision>
22
23 Precision compute_sigma_a(std::vector<Precision> &Pn, std::vector<Precision> &Qn, std::vector<Precision> &Cn, Precision b, Precision t_over_tphi)
24
25 {
26 //
27 // get number of elements to be computed
28 //
29 int nmax=Pn.size();
30 //
31 // allocate memory
32 //
33 Precision sigma_a=0.0;
34 //
35 // loop on orders
36 //
37 for ( int i=0 ; i<nmax ; i++ )
38 {
39     sigma_a = sigma_a + Cn[i]*Pn[i]*Pn[i];
40 }
41 //
42 // add factors
43 //
44 sigma_a = sigma_a*b/(1.0+t_over_tphi)/(1.0+t_over_tphi)/3.141592653589793238462643383279502;
45 //
46 // return result
47 //
48 return sigma_a;
49 }
50
51 /// \brief compute sigma_b contribution
52 ///
53 /// compute b/pi * sum_n (Cn+C_{n+1})*Qn/2
54 ///
55 /// \param Pn Pn(s) values up to order n, without 1/(1+z) factor
56 /// \param Qn Qn(s) values up to order n, without 1/(1+z) factor
57 /// \param Cn Cn(s) values up to order n
58 /// \param b real number, the fit parameter for Cns.
59 /// \param t_over_tphi real number, the fit parameter for Cns.
60 template <class Precision>
61 Precision compute_sigma_b(std::vector<Precision> &Pn, std::vector<Precision> &Qn, std::vector<Precision> &Cn, Precision b, Precision t_over_tphi)
62 {
63 //
64 // get number of elements to be computed
65 //
66 int nmax=Pn.size();
67 //
68 // allocate memory
69 //
70 Precision sigma_b=0.0;

```

```
71 //
72 // loop on orders
73 //
74 for ( int i=0 ; i<nmax-1 ; i++ )
75 {
76     sigma_b = sigma_b + (Cn[i]+Cn[i+1])*Qn[i]*Qn[i];
77 }
78 //
79 // add factors
80 //
81 sigma_b = sigma_b*b/(1.0+t_over_tphi)/(1.0+t_over_tphi)/2.0/3.141592653589793238462643383279502;
82 //
83 // return result
84 //
85 return sigma_b;
86 }
87
88 #endif
```

- 
- [1] Kuntsevich, A.Y. *et al.* Intervalley scattering and weak localization in Si-based two-dimensional structures. *Phys. Rev. B.* **75**, 195330 (2007).
  - [2] Kawabata, A.Y On the field dependence of magnetoresistance in two-dimensional systems. *J. Phys. Soc. Jpn* **53**, 3540 (1984).
  - [3] McPhail, S. *et al.* Weak localization in high-quality two-dimensional systems. *Phys. Rev. B.* **70**, 245311 (2004).
